# Supplementary material for: Borna disease virus possesses an NF-ĸB inhibitory sequence in the nucleoprotein gene
Source: PubMed Central journal article supplement (PMC4649702; doi:10.1038/srep08696), 2015-03-03
Supplement: srep08696-s1.pdf [file srep08696-s1.pdf]

## Supplementary Information

**Title** Borna disease virus possesses an NF- $\kappa$ B inhibitory sequence in the nucleoprotein gene.

**Author names** Akiko Makino<sup>1,2†</sup>, Kan Fujino<sup>1\*</sup>, Nicholas F. Parrish<sup>1</sup>, Tomoyuki Honda<sup>1,3</sup>, Keizo Tomonaga<sup>1,3,4†</sup>

### Affiliations

<sup>1</sup>Department of Viral Oncology, and <sup>2</sup>Center for Emerging Virus Research, Institute for Virus Research, <sup>3</sup>Department of Tumor Viruses, Graduate School of Medicine, <sup>4</sup>Department of Mammalian Regulatory Network, Graduate School of Biostudies, Kyoto University, Kyoto 606-8507, Japan.

†Authors for correspondence

Email; tomonaga@virus.kyoto-u.ac.jp, akkmakino@gmail.com

\*Present address; Department of Microbiology II, School of Veterinary Medicine, Azabu University, Fuchinobe, Chuo-ku, Sagamihara-shi, Kanagawa, 252-5201, Japan

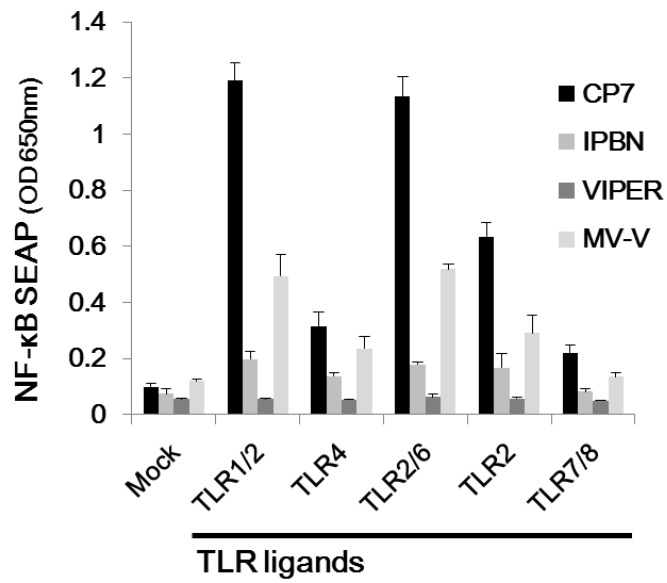

**Figure S1 Inhibitory effect of peptide derived from Measles virus V protein on NF-κB activation.**

THP1-CD14 cells were pre-treated with 100 μg/ml of IPBN, the peptide derived from Measles virus V protein (MV-V), the negative control peptide (CP7), or the positive control peptide (VIPER), and stimulated with five kinds of TLR ligands, respectively. At 24 h post-stimulation, SEAP activities in the supernatants were measured. Error bars represent standard deviation of the mean (N=3). The result of IPBN, CP7, and VIPER pre-treatments are same as shown in Figure 2C.

## Input

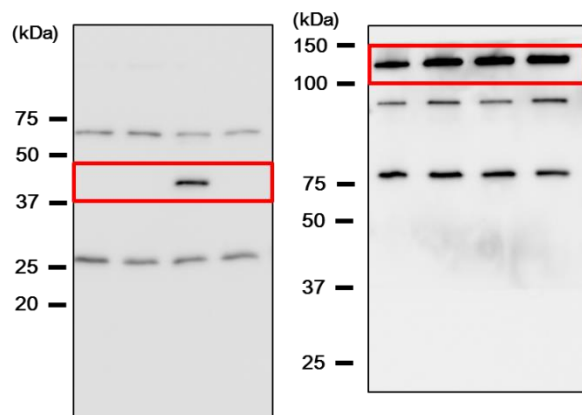

## Output

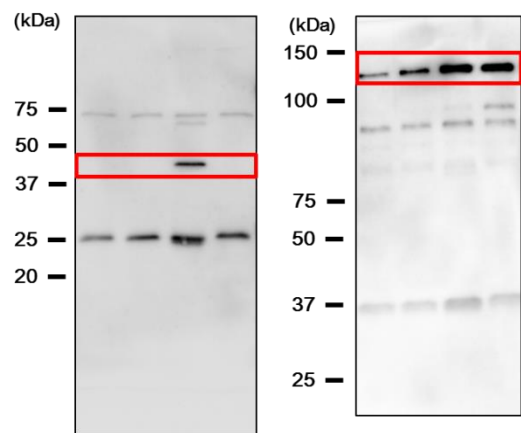

**Figure S2 Full-length blots of Figure 3**

## Lysate

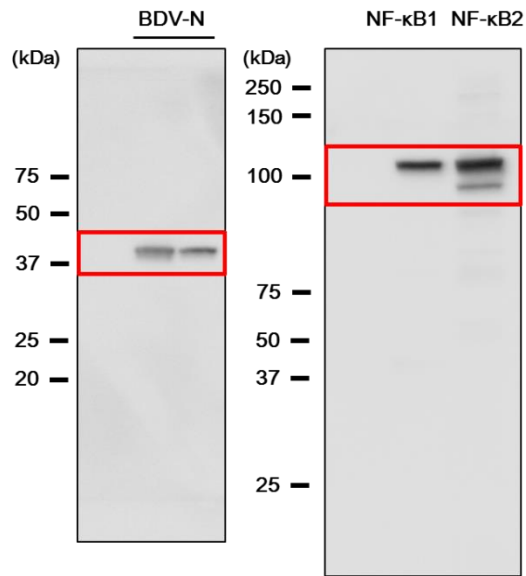

## IP

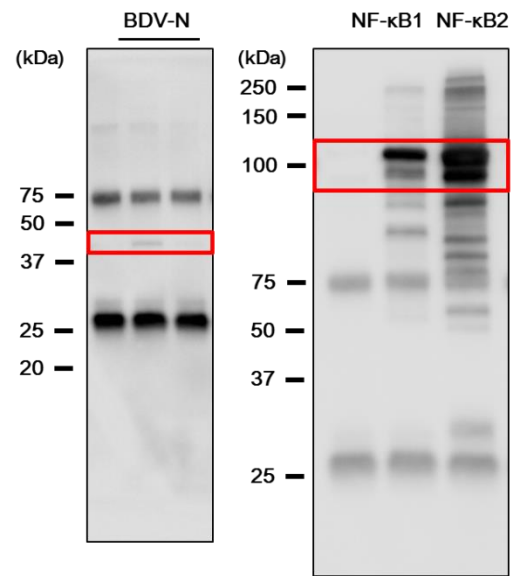

**Figure S3 Full-length blots of Figure 4A**

# Lysate

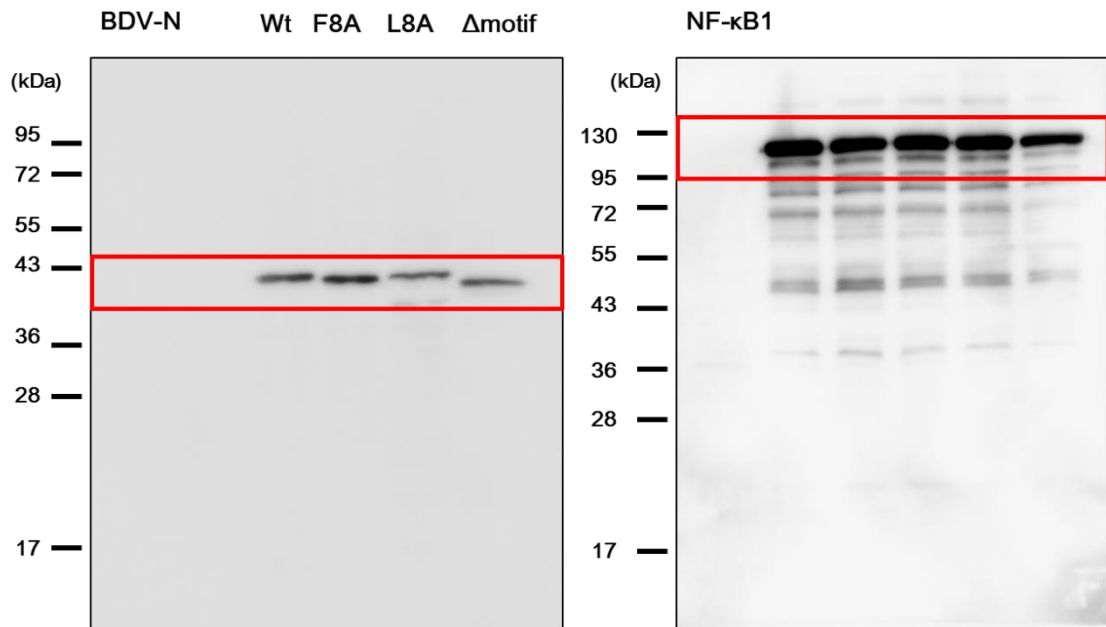

**Figure S4A Full-length blots of cell lysates in Figure 4B**

# IP

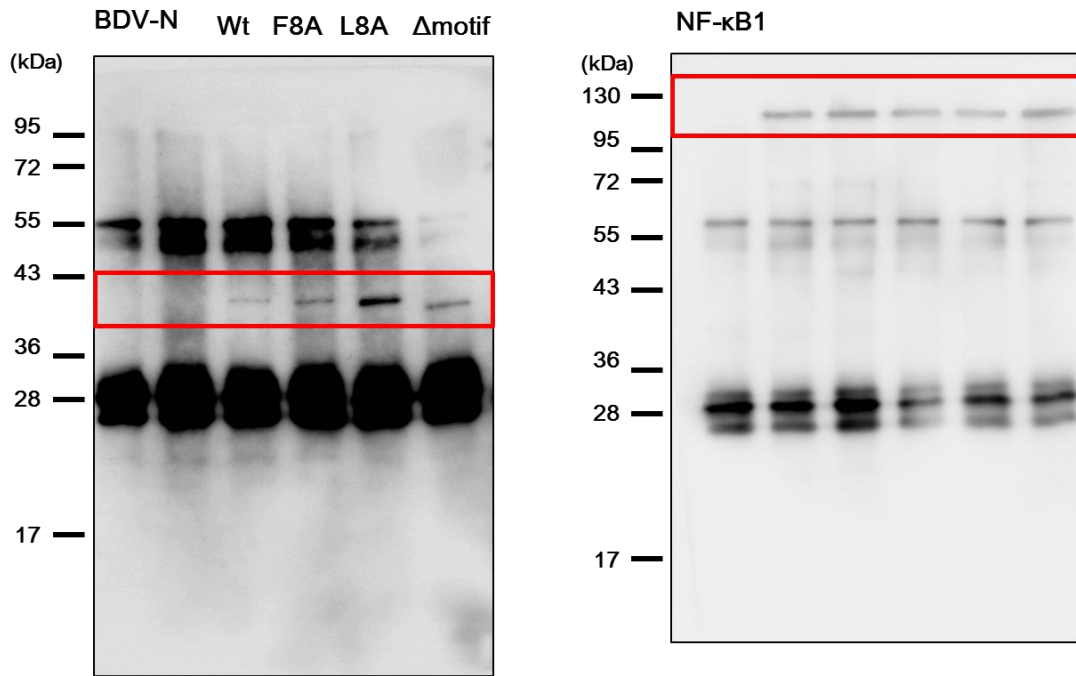

**Figure S4B Full-length blots of IP products in Figure 4B**
